# Supplementary material
Source: publisher figshare collection journal article supplement (https://rs.figshare.com/ndownloader/files/38311096)
Supplement: Supplementary file 1 [file 38311096]

## Sheet: pH
Date	1	3	4	10	11	12
2022-04-15	7.68844	7.70439	8.02058	7.62066	8.01829	7.98421
2022-04-16	7.65093	7.6484	7.91703	7.58509	7.96391	7.94464
2022-04-17	7.60343	7.63425	7.95815	7.66012	7.93977	7.93629
2022-04-18	7.69763	7.69844	7.9589	7.76353	7.95314	7.9645
2022-04-20	7.67425	7.71514	7.98654	7.69846	7.97652	7.99489
2022-04-22	7.64	7.66741	8.01621	7.70911	8.00752	8.05696
2022-04-24	7.52962	7.72079	7.99823	7.71244	7.98654	8.00807
2022-04-26	7.67227	7.71745	7.99285	7.7016	7.97633	7.978
2022-04-28	7.65239	7.73247	8.02289	7.7091	8.00733	8.01361
2022-04-30	7.67486	7.69323	8.03291	7.7041	8.05216	8.01308
2022-05-02	7.67	7.7	8.08	7.79	8.1	8.1
2022-05-04	7.68	7.7	8.13	7.68	8.1	8.12

## Sheet: TA
Day	1	3	4	10	11	12
2022-04-15	2369.82	2370.71	2367.71	2373.67	2371.37	2368.21
2022-04-15	2366.29	2371.75	2373.79	2368.16	2373.1	2372.92
2022-04-16	2329.88	2345.16	2350.6	2350.07	2343.66	2355.65
2022-04-16	2328.99	2346.19	2344	2351.36	2349.16	2348.9
2022-04-17	2223.97	2333.37	2331.59	2328.31	2330.16	2294.81
2022-04-17	2221.97	2337.71	2339.53	2330.1	2331.42	2294.67
2022-04-18	2166.95	2319.17	2338.47	2326.92	2322.28	2300.36
2022-04-18	2165.92	2325.57	2337.89	2328.77	2320.35	2301.91
2022-04-20	2324.6	2315.62	2317.25	2325.95	2304.05	2319.35
2022-04-20	2316.76	2319.43	2323.94	2325.92	2306.23	2316.79
2022-04-22	2209.08	2247.69	2310.34	2295.77	2281.19	2337.31
2022-04-22	2204.78	2247.32	2314.29	2302.56	2285.34	2340.82
2022-04-24	2271.11	2272.07	2305.04	2301.09	2268.77	2292.84
2022-04-24	2273.96	2278.51	2313.95	2303.93	2265.1	2292.12
2022-04-26	2327.51	2305.06	2329.75	2330.26	2302.99	2330.43
2022-04-26	2324.63	2301.12	2330.89	2326.22	2302.05	2325.48
2022-04-28	2294	2303	2332	2340	2289	2338
2022-04-28	2300	2308	2321	2335	2282	2337
2022-04-30	2335.76	2347.45	2354.53	2346.88	2342.58	2348.86
2022-04-30	2335.18	2346.51	2355.65	2353.74	2352.93	2352.91
2022-05-02	2303	2268	2334	2323	2313	2316
2022-05-02	2308	2267	2336	2329	2318	2317
2022-05-04	2295.24	2330.06	2347.34	2331.61	2311.47	2321.2
2022-05-04	2297.53	2326.84	2349.99	2331.43	2307.36	2324.56

## Sheet: CT
Day	1	3	4	10	11	12
2022-04-15	2197.55	2196.02	2029.16	2245.25	2042.6	2065.03
2022-04-16	2185.3	2211.62	2083.94	2240.88	2050.79	2066.65
2022-04-17	2105.74	2207.09	2032.32	2191.23	2051.53	2011.97
2022-04-18	2028.18	2169.42	2046.1	2149.65	2041.87	2013.62
2022-04-20	2172.71	2151.19	2022.01	2166.62	2006.61	2014.73
2022-04-22	2076.35	2108.8	1994.77	2141.9	1970.83	1990.9
2022-04-24	2183.83	2114.25	2006.73	2143.64	1975.02	1983.64
2022-04-26	2183.47	2142.02	2017.8	2172.33	2011.57	2026.46
2022-04-28	2153.53	2132.59	1995.68	2171.03	1963.71	2002.81
2022-04-30	2183.78	2191.5	2022.9	2191.71	2011.7	2041.1
2022-05-02	2169.85	2115.69	1976.91	2129.57	1948.18	1946.46
2022-05-04	2143.29	2173.06	1957.33	2183.82	1938.34	1942.46

## Sheet: pCO2
Day	1	3	4	10	11	12
2022-04-15	1051.15	1014.09	427.994	1272.76	435.27	479.687
2022-04-16	1150.76	1179.65	576.871	1390.78	501.928	531.105
2022-04-17	1246.58	1218.18	502.371	1132.91	533.497	525.72
2022-04-18	970.88	1025.51	507.153	872.819	515.976	494.85
2022-04-20	1084.7	973.529	469.639	1020.81	475.616	458.146
2022-04-22	1121	1075.19	429.787	987.174	431.549	384.051
2022-04-24	1536.98	947.341	452.317	980.054	458.568	436.222
2022-04-26	1092.01	967.55	459.002	1019	479.438	478.517
2022-04-28	1130.05	925.158	420.465	997.983	428.32	430.109
2022-04-30	1083.82	1044.13	417.643	1023.12	394.918	445.741
2022-05-02	1107.7	1001.27	365.014	808.711	341.223	334.777
2022-05-04	1060.85	1026.72	316.155	1078.36	332.793	320.42

## Sheet: Omega
Day	1	3	4	10	11	12
2022-04-15	2.10915	2.18423	3.85401	1.76821	3.77412	3.51706
2022-04-16	1.90222	1.85551	3.12645	1.64615	3.41242	3.316
2022-04-17	1.63464	1.80169	3.36907	1.92877	3.23383	3.21104
2022-04-18	1.84629	2.0165	3.36933	2.28778	3.26671	3.34931
2022-04-20	1.94968	2.12009	3.46779	2.05864	3.41452	3.51555
2022-04-22	1.7402	1.85254	3.66456	2.04619	3.53537	3.9364
2022-04-24	1.41419	2.07217	3.49941	2.0629	3.36169	3.55673
2022-04-26	1.88999	2.08409	3.57822	2.04944	3.37761	3.45893
2022-04-28	1.88064	2.1743	3.76417	2.13663	3.58975	3.76409
2022-04-30	1.96472	2.02627	3.84553	2.08737	3.86062	3.64718
2022-05-02	1.83913	1.98142	4.10442	2.44117	4.18236	4.20619
2022-05-04	1.96632	2.04699	4.45441	1.97575	4.21002	4.31829

## Sheet: Temp
Date	1	3	4	10	11	12
2022-04-15	29	29.06	28.83	28.83	28.67	28.83
2022-04-16	29.2	29.1	28.9	28.6	28.7	28.9
2022-04-16	29	28.9	28.9	29.1	28.7	28.8
2022-04-16	28.8	28.3	28.5	28.4	28.5	28.8
2022-04-17	28.9	28.6	28.5	28.7	28.5	28.7
2022-04-17	29.1	29	28.6	29.1	28.6	28.8
2022-04-17	29	28.9	28.8	28.8	28.4	28.5
2022-04-18	29	28.7	28.7	28.9	28.6	29
2022-04-18	28.7	29	29.1	29.3	28.4	28.7
2022-04-18	29	28.7	29	29.1	28.4	28.7
2022-04-19	28.6	28.9	28.7	28.8	28.8	28.6
2022-04-19	28.6	28.7	28.8	29.1	28.7	28.6
2022-04-19	28.8	29	28.8	28.7	28.3	28.4
2022-04-20	28.8	28.9	28.6	28.9	28.6	28.6
2022-04-20	29.1	28.9	28.7	29	28.7	28.7
2022-04-20	28.8	29	28.9	29	28.7	28.4
2022-04-21	29.06	28.72	28.56	28.61	28.61	28.83
2022-04-21	28.89	28.78	29.11	29	28.5	28.83
2022-04-21	28.78	28.94	28.89	29.22	28.83	28.44
2022-04-22	28.9	29	28.8	28.8	28.3	28.2
2022-04-22	28.6	29	28.8	28.9	28.7	28.5
2022-04-22	28.8	28.8	28.7	29	28.4	28.5
2022-04-23	29	29	28.7	29.1	28.4	28.4
2022-04-23	29	28.9	28.6	28.8	28.4	28.5
2022-04-23	28.9	28.9	29	28.9	28.6	28.9
2022-04-24	28.9	29.2	28.7	29.2	28.4	28.4
2022-04-24	28.6667	28.7778	28.4444	28.7778	28.4444	28.6111
2022-04-24	28.6	29.3	28.4	28.7	28.6	28.5
2022-04-25	29.2	29.2	28.6	29	28.6	28.7
2022-04-25	29	28.9	28.7	29.1	28.7	28.9
2022-04-25	28.8	28.8	29	28.9	28.4	28.5
2022-04-26	28	28.8	28.8	28.9	28.6	28.6
2022-04-26	28.8	29.1	28.8	29.2	28.6	28.6
2022-04-26	28.8	29	28.7	28.7	28.3	28.7
2022-04-27	28.8	29	28.9	28.9	28.8	28.8
2022-04-27	29	29.2	28.5	29	28.6	28.4
2022-04-27	28.9	29	28.8	29	28.5	28.8
2022-04-28	29	28.8	28.8	29.2	28.5	28.9
2022-04-28	28.7	29	29	29.2	28.4	28.4
2022-04-28	28.6	29.2	28.7	28.7	28.7	28.7
2022-04-29	28.6	29.1	28.7	28.7	28.6	28.7
2022-04-29	28.9	29.1	28.8	28.9	28.6	28.4
2022-04-29	28.9	28.7	28.8	28.8	28.5	28.5
2022-04-30	28.5	28.5	28.8	29	28	28.6
2022-04-30	29	28.8	28.8	28.9	28.7	28.6
2022-04-30	28.8	29.1	29	28.8	28.4	28.7
2022-05-01	28.7	29	28.7	28.8	28.7	28.6
2022-05-01	28.8	29	29	28.8	28.3	28.5
2022-05-01	28.9	29.1	28.6	28.3	28.3	28.3
2022-05-02	29.1	28.6	28.6	28.8	28.3	28.7
2022-05-02	28.2	28.9	28.8	29	28.6	28.4
2022-05-02	28.6	29.2	28.7	28.2	28.4	28.5
2022-05-03	28.7	29	28.6	28.6	28.8	28.5
2022-05-03	28.9	29.2	28.6	29.2	28.7	28.4
2022-05-03	29.2	29.2	28.5	28.9	28.3	28.3
2022-05-04	28.9	29	28.7	28.5	28.3	28.5
2022-05-04	29	28.9	29	29	28.6	28.5
2022-05-04	28.9	29	28.5	29	28.5	28.3
2022-05-05	28.8	28.8	28.7	28.8	28.7	28.7
2022-05-05	29.1	29.1	28.4	29	28.5	28.8
2022-05-05	28.9	28.9	28.5	28.9	28.3	28.7
2022-05-06	28.5	29	28.1	29	28.6	28.7

## Sheet: Salinity
Day	1	3	4	10	11	12
2022-04-15	39	38	37	36	36	36
2022-04-16	37	35	35	35	36	35
2022-04-17	36	35	37	36	36	37
2022-04-18	33	35	36	34	35	35
2022-04-19	37	35	37	36	36	35
2022-04-20	36	36	35	36	36	35
2022-04-21	39	38	37	36	36	36
2022-04-22	36	35	35	35	36	36
2022-04-23	37	37	37	35	35	35
2022-04-24	36	35	35	35	35	35
2022-04-25	36	35	36	37	36	36
2022-04-26	36	35	36	35	35	36
2022-04-27	36	36	35	35	36	26
2022-04-28	37	36	36	36	37	37
2022-04-29	35	35	35	35	35	35
2022-04-30	37	36	35	35	35	34
2022-05-01	35	34	34	35	34	34
2022-05-02	35	35	35	35	35	35
2022-05-03	36	36	36	35	35	35
2022-05-04	37	35	35	35	35	35
2022-05-05	35	35	35	35	35	35
2022-05-06	36	35	37	35	35	35

## Sheet: Light
Day	1	3	4	10	11	12
2022-04-15	464.7	455.6	449.9	500.9	456	520.7
2022-04-17	508.66	500.925	535.9	520.325	531.083	500.85
2022-04-20	491	507	504	510	497	517
2022-04-23	347.4	421	521	494	515	447
2022-04-25	450	458	500	505	544	510
2022-04-27	412	374.725	370.3	502.7	528.075	433
2022-05-01	500.06	460.98	504.72	461.74	600.34	502.76
2022-05-05	435.84	473.72	472.68	483.22	565.82	449.32

## Sheet: Metadata
These data describe the tank conditions in the 2022 experiment as summarized in Table S1
In all tabs
Date = date of measuement
Column numbers = treatment tank as listed in Table S1
Tabs
pH = seawater pH on total scale
TA = total alkalinity in units of µmol/kg
CT = dissolved inorganic carbon in units of µmol/kg
pCO2 = partial pressure pf CO2 gas in seawater in units of µatm
Omega = saturation state of aragonite
Temp = seawater temperature °C
Salinity = salinity in units of psu
Light = light intensity in units of µmol photons/m2/s
